# Supplementary material for: CT texture analysis of tonsil cancer: Discrimination from normal palatine tonsils
Source: PubMed Central journal article supplement (PMC8357133; doi:10.1371/journal.pone.0255835), 2021-08-11
Supplement: pone.0255835.s001.pdf [file pone.0255835.s001.pdf]

S1 Table. Results of correlation between texture analysis and <sup>18</sup>F-FDG PET/CT parameters

|                |          | SSF0    |         | SSF2    |         | SSF3    |         | SSF4    |         | SSF5    |         | SSF6    |         |
|----------------|----------|---------|---------|---------|---------|---------|---------|---------|---------|---------|---------|---------|---------|
|                |          | Pearson | p value | Pearson | p value | Pearson | p value | Pearson | p value | Pearson | p value | Pearson | p value |
| SUVmax         | Mean     | 0.28    | 0.04*   | -0.19   | 0.17    | -0.22   | 0.1     | -0.21   | 0.13    | -0.18   | 0.2     | -0.13   | 0.33    |
|                | SD       | 0.004   | 0.98    | 0.15    | 0.28    | 0.14    | 0.3     | 0.1     | 0.47    | 0.05    | 0.75    | -0.02   | 0.86    |
|                | Entropy  | 0.03    | 0.83    | 0.17    | 0.21    | 0.18    | 0.19    | 0.13    | 0.33    | 0.07    | 0.61    | 0.003   | 0.98    |
|                | MPP      | 0.27    | 0.048*  | 0.06    | 0.66    | 0.03    | 0.85    | -0.03   | 0.86    | -0.07   | 0.62    | -0.1    | 0.47    |
|                | Skewness | -0.03   | 0.81    | 0.1     | 0.48    | 0.12    | 0.38    | 0.15    | 0.29    | 0.2     | 0.16    | 0.24    | 0.08    |
|                | Kurtosis | 0.09    | 0.5     | -0.08   | 0.57    | -0.11   | 0.44    | -0.05   | 0.74    | 0.04    | 0.8     | 0.08    | 0.56    |
| SUVmean        | Mean     | 0.3     | 0.03*   | -0.19   | 0.18    | -0.21   | 0.12    | -0.2    | 0.15    | -0.17   | 0.22    | -0.13   | 0.36    |
|                | SD       | 0.03    | 0.81    | 0.2     | 0.15    | 0.17    | 0.23    | 0.11    | 0.41    | 0.06    | 0.68    | -0.02   | 0.9     |
|                | Entropy  | 0.07    | 0.61    | 0.22    | 0.11    | 0.2     | 0.14    | 0.15    | 0.29    | 0.08    | 0.58    | -0.006  | 0.96    |
|                | MPP      | 0.29    | 0.03*   | 0.13    | 0.37    | 0.06    | 0.69    | -0.01   | 0.95    | -0.05   | 0.71    | -0.09   | 0.53    |
|                | Skewness | 0.02    | 0.88    | 0.18    | 0.21    | 0.17    | 0.22    | 0.19    | 0.16    | 0.24    | 0.09    | 0.24    | 0.08    |
|                | Kurtosis | 0.02    | 0.91    | -0.13   | 0.35    | -0.17   | 0.23    | -0.09   | 0.53    | -0.01   | 0.96    | 0.04    | 0.79    |
| TLG            | Mean     | 0.14    | 0.33    | -0.34   | 0.01*   | -0.35   | 0.01*   | -0.34   | 0.01*   | -0.31   | 0.02*   | -0.26   | 0.06    |
|                | SD       | -0.04   | 0.76    | -0.074  | 0.6     | 0.01    | 0.92    | 0.04    | 0.8     | 0.02    | 0.91    | -0.01   | 0.95    |
|                | Entropy  | -0.03   | 0.86    | -0.04   | 0.77    | 0.05    | 0.7     | 0.09    | 0.52    | 0.08    | 0.57    | 0.06    | 0.67    |
|                | MPP      | 0.12    | 0.4     | -0.16   | 0.25    | -0.12   | 0.4     | -0.11   | 0.42    | -0.14   | 0.31    | -0.16   | 0.25    |
|                | Skewness | 0.17    | 0.23    | 0.16    | 0.24    | 0.18    | 0.2     | 0.16    | 0.24    | 0.2     | 0.14    | 0.28    | 0.04*   |
|                | Kurtosis | 0.09    | 0.52    | 0.13    | 0.35    | 0.11    | 0.43    | 0.08    | 0.57    | 0.12    | 0.38    | 0.19    | 0.16    |
| SUV max<br>T/N | Mean     | 0.21    | 0.13    | -0.11   | 0.44    | -0.14   | 0.30    | -0.15   | 0.29    | -0.14   | 0.31    | -0.13   | 0.36    |
|                | SD       | 0.18    | 0.2     | 0.25    | 0.07    | 0.22    | 0.11    | 0.19    | 0.18    | 0.15    | 0.27    | 0.11    | 0.43    |
|                | Entropy  | 0.2     | 0.14    | 0.27    | 0.04*   | 0.25    | 0.07    | 0.21    | 0.13    | 0.17    | 0.21    | 0.14    | 0.31    |
|                | MPP      | 0.21    | 0.12    | 0.17    | 0.23    | 0.11    | 0.43    | 0.05    | 0.70    | 0.01    | 0.94    | -0.02   | 0.91    |
|                | Skewness | -0.11   | 0.44    | 0.02    | 0.9     | 0.01    | 0.95    | 0.03    | 0.84    | 0.09    | 0.53    | 0.17    | 0.21    |

|         |          |       |       |       |       |       |       |       |       |       |      |       |      |
|---------|----------|-------|-------|-------|-------|-------|-------|-------|-------|-------|------|-------|------|
|         | Kurtosis | 0.03  | 0.82  | -0.13 | 0.34  | -0.17 | 0.23  | -0.14 | 0.30  | -0.06 | 0.66 | -0.01 | 0.95 |
| SUVmean | Mean     | 0.20  | 0.14  | -0.04 | 0.76  | -0.06 | 0.67  | -0.07 | 0.63  | -0.07 | 0.61 | -0.07 | 0.62 |
| T/N     | SD       | 0.28  | 0.04* | 0.36  | 0.01* | 0.32  | 0.02* | 0.29  | 0.03* | 0.26  | 0.06 | 0.21  | 0.13 |
|         | Entropy  | 0.30  | 0.03* | 0.36  | 0.01* | 0.33  | 0.02* | 0.30  | 0.03* | 0.26  | 0.06 | 0.22  | 0.11 |
|         | MPP      | 0.22  | 0.12  | 0.28  | 0.04* | 0.21  | 0.13  | 0.16  | 0.26  | 0.12  | 0.39 | 0.08  | 0.54 |
|         | Skewness | -0.11 | 0.43  | 0.02  | 0.88  | -0.03 | 0.85  | 0.00  | 1.00  | 0.09  | 0.52 | 0.18  | 0.19 |
|         | Kurtosis | -0.03 | 0.81  | -0.18 | 0.19  | -0.20 | 0.15  | -0.15 | 0.27  | -0.09 | 0.52 | -0.04 | 0.75 |
| TLG T/N | Mean     | 0.29  | 0.03* | -0.18 | 0.19  | -0.18 | 0.20  | -0.15 | 0.29  | -0.11 | 0.42 | -0.07 | 0.62 |
|         | SD       | 0.14  | 0.31  | 0.10  | 0.46  | 0.14  | 0.31  | 0.16  | 0.24  | 0.17  | 0.21 | 0.17  | 0.22 |
|         | Entropy  | 0.15  | 0.28  | 0.14  | 0.32  | 0.17  | 0.21  | 0.19  | 0.16  | 0.20  | 0.15 | 0.20  | 0.14 |
|         | MPP      | .300* | 0.03  | 0.02  | 0.88  | 0.02  | 0.89  | 0.02  | 0.86  | 0.02  | 0.89 | 0.03  | 0.85 |
|         | Skewness | -0.07 | 0.59  | 0.02  | 0.89  | -0.02 | 0.86  | -0.06 | 0.66  | -0.05 | 0.69 | -0.01 | 0.96 |
|         | Kurtosis | 0.05  | 0.71  | -0.01 | 0.94  | -0.02 | 0.91  | 0.01  | 0.92  | 0.11  | 0.44 | 0.18  | 0.20 |

\* Statistically significant

TLG total lesion glycolysis, T/N tumor to normal ratio
